# Supplementary material
Source: Springer Nature journal article supplement (https://www.springermedizin.de/resource/supplementary/13002_2012_298_MOESM2_ESM.pdf/9627572)

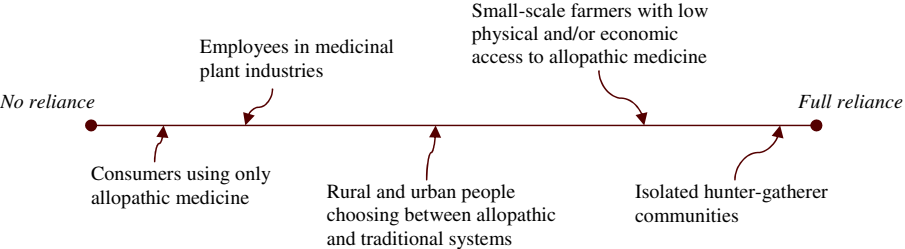

Supplement: MOESM2 [file 9627572]
